# Supplementary material
Source: publisher site journal article supplement (https://www.e-cmh.org/upload/media/cmh-2023-0515-Supplementary-Fig-1.pdf)
Supplement: Supplementary file 1 [file cmh-2023-0515-Supplementary-Fig-1.pdf]

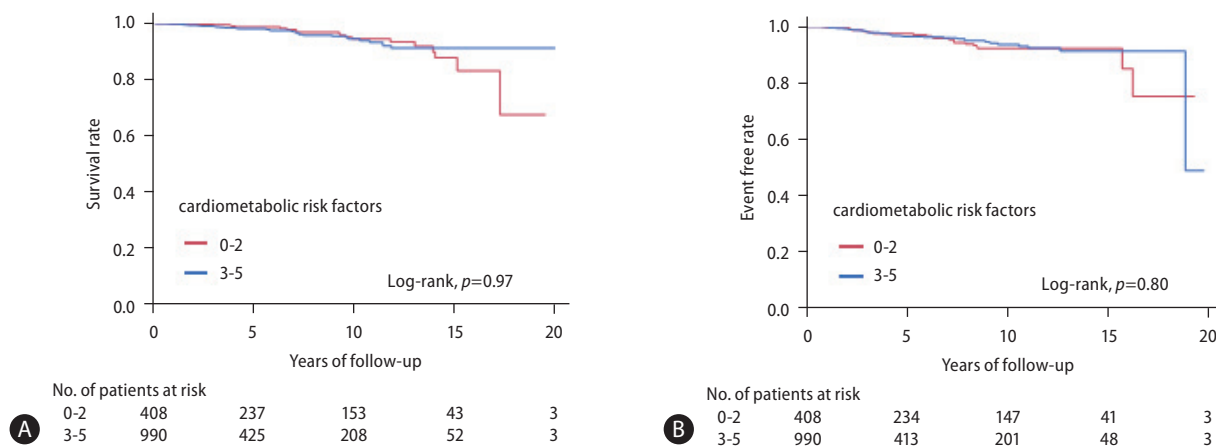

**Supplementary Figure 1.** Overall mortality and liver-related events stratified according to cumulative number of cardiometabolic risk factors in patients with NAFLD (n=1,398). (A) Overall mortality, and (B) liver-related events according to cumulative number of cardiometabolic risk factors in patients with NAFLD. NAFLD, nonalcoholic fatty liver disease.
